# Supplementary material for: Proanthocyanidins in seed coat tegmen and endospermic cap inhibit seed germination in Sapium sebiferum
Source: PeerJ. 2018 Apr 26;6:e4690. doi: 10.7717/peerj.4690 (PMC5924686; doi:10.7717/peerj.4690)
Supplement: Supplemental Information 5 — Fifty grams of S. sebiferum seeds were taken for this experiment. The water uptake was calculated by weighing seeds before and after imbibition. Data were collected was taken 72 hours after imbibition. [file peerj-06-4690-s005.xlsx]

## Sheet: Sheet1
Impact of sulfuric acid scarification on the water uptake (%) of S. sebiferum seeds
Incubation time (minute)	Water uptake (%)
0	16.6508
0	15.3
0	17.8
10	16.8532
10	17.2
10	19.1
20	17.8
20	20.3
20	18.7
30	20.95
30	18.1
30	19.9
40	21.5
40	20.2
40	18.4
50	22.44
50	19.7
50	19.3
60	19
60	20.5
60	22.5
