# Supplementary material for: Proanthocyanidins in seed coat tegmen and endospermic cap inhibit seed germination in Sapium sebiferum
Source: PeerJ. 2018 Apr 26;6:e4690. doi: 10.7717/peerj.4690 (PMC5924686; doi:10.7717/peerj.4690)
Supplement: Supplemental Information 6 — Incubation time (minute), H2SO4 scarification time. Data were collected one month after seed sowing. [file peerj-06-4690-s006.xlsx]

## Sheet: agmc
Impact of sulfuric acid scarification on seed germination in S. sebiferum
Incubation time (minute)	Germination (%)
0	2.5
0	2
0	1.5
10	42
10	40
10	41
20	40
20	45
20	50
30	60
30	50
30	48
40	70
40	65
40	70
50	65
50	60
50	70
60	55
60	60
60	50
