# Supplementary material for: Proanthocyanidins in seed coat tegmen and endospermic cap inhibit seed germination in Sapium sebiferum
Source: PeerJ. 2018 Apr 26;6:e4690. doi: 10.7717/peerj.4690 (PMC5924686; doi:10.7717/peerj.4690)
Supplement: Supplemental Information 7 — Incubation time (minute), H2SO4 scarification time. Data were collected 45 days after seed sowing. [file peerj-06-4690-s007.xlsx]

## Sheet: rootshoot length
Impact of sulfuric acid scarification on root and shoot length of S. sebiferum
Incubation time (minute)	Shoot (cm)	Root (cm)
0	6.5	7.6
0	7.1	6.6
0	7.5	6
10	8.8	10.8
10	9.8	13.5
10	9.1	12.9
20	10	11.5
20	8.9	13
20	11.2	12
30	11	13
30	13.8	11
30	12	15
40	11.4	13.4
40	13.9	15
40	15.3	11
50	11.35	12.6
50	12	15
50	13.9	10
60	9.6	11.5
60	7.6	10
60	10.2	9
