# Supplementary material for: Proanthocyanidins in seed coat tegmen and endospermic cap inhibit seed germination in Sapium sebiferum
Source: PeerJ. 2018 Apr 26;6:e4690. doi: 10.7717/peerj.4690 (PMC5924686; doi:10.7717/peerj.4690)
Supplement: Supplemental Information 11 — SCE and PAs were added in half MS. Twelve seeds were sown in each 10 cm2 Patri plate. Data were collected after 7 days of imbibition. [file peerj-06-4690-s011.xlsx]

## Sheet: Sheet1
Effect of Seed coat extract (SCE) and proanthocynidins (PAs) on S. sebiferum seed germination
Treatment	Concentration(%)	Germination(%)
SCE	0	85
SCE	0	92
SCE	0	78
SCE	0.1	50
SCE	0.1	55
SCE	0.1	45
SCE	0.2	30
SCE	0.2	35
SCE	0.2	25
SCE	0.3	25
SCE	0.3	30
SCE	0.3	20
PAs	0	85
PAs	0	92
PAs	0	78
PAs	0.1	25
PAs	0.1	30
PAs	0.1	20
PAs	0.2	15
PAs	0.2	18
PAs	0.2	12
PAs	0.3	10
PAs	0.3	15
PAs	0.3	5
