# Supplementary material for: Proanthocyanidins in seed coat tegmen and endospermic cap inhibit seed germination in Sapium sebiferum
Source: PeerJ. 2018 Apr 26;6:e4690. doi: 10.7717/peerj.4690 (PMC5924686; doi:10.7717/peerj.4690)
Supplement: Supplemental Information 13 — Germination, germination (%), Seeds were primed in double distilled water (Control), 50 μΜ GA3, 50 μM NDGA, 20 mM H2O2 and 0.4% KNO3 and were sowed in 0.3% SCE-supplemented half MS medium. Twelve seeds were sown in each 9 cm diameter Petri dishes. Data were collected after 7 days of imbibition. [file peerj-06-4690-s013.xlsx]

## Sheet: Sheet1
Inhibitory effects of SCE on seed germination was alleviated by GA3, NDGA, H2O2 and KNO3
Treatment	Germination (%)
Control	33.3
Control	41.67
Control	33.3
GA3	91.67
GA3	97
GA3	91.67
NDGA	93
NDGA	91.67
NDGA	91
H2O2	91.67
H2O2	100
H2O2	100
KNO3	91.67
KNO3	100
KNO3	100
